# Supplementary material
Source: PubMed Central journal article supplement (PMC6688645)
Supplement: NIHMS1042317-supplement-SI.pdf [file NIHMS1042317-supplement-SI.pdf]

**Supporting information**

**Mini Gold Nanorods with Tunable Plasmonic Peaks Beyond 1000 nm**

Huei-Huei Chang and Catherine J. Murphy

Department of Chemistry, University of Illinois at Urbana-Champaign, 600 South Mathews Avenue, Urbana, IL 61801, United States

| AR         | 0.10 M CTAB (mL) | 0.010 M AgNO <sub>3</sub> (mL) | 0.10 M AgNO <sub>3</sub> (mL) | 1.0 M HCl (mL) | 0.10 M ascorbic acid (mL) | 0.10 M hydroquinone (mL) | Seed solution (mL) |
|------------|------------------|--------------------------------|-------------------------------|----------------|---------------------------|--------------------------|--------------------|
| 2.2 ± 0.6  | 8.0              | 0.030                          | N/A                           | 0.20           | 0.080                     | N/A                      | 2.0                |
| 2.6 ± 0.7  | 8.0              | 0.050                          | N/A                           | 0.20           | 0.080                     | N/A                      | 2.0                |
| 3.2 ± 0.8  | 8.0              | 0.10                           | N/A                           | 0.20           | 0.080                     | N/A                      | 2.0                |
| 3.8 ± 1.0  | 9.0              | 0.10                           | N/A                           | 0.20           | 0.080                     | N/A                      | 1.0                |
| 5.6 ± 1.3  | 8.0              | N/A                            | 0.040                         | N/A            | N/A                       | 0.50                     | 2.0                |
| 8.2 ± 2.3  | 8.0              | N/A                            | 0.040                         | 0.013          | N/A                       | 0.50                     | 2.0                |
| 8.7 ± 1.9  | 8.0              | N/A                            | 0.040                         | 0.019          | N/A                       | 0.50                     | 2.0                |
| 9.6 ± 2.1  | 8.0              | N/A                            | 0.040                         | 0.025          | N/A                       | 0.50                     | 2.0                |
| 10.8 ± 2.8 | 8.0              | N/A                            | 0.040                         | 0.036          | N/A                       | 0.50                     | 2.0                |

**Table S1.** Summary of reagents used for synthesizing mini AuNRs of 9 aspect ratios (ARs). All growth solutions contained 0.50 mL of 0.010 M HAuCl<sub>4</sub> • 3H<sub>2</sub>O.

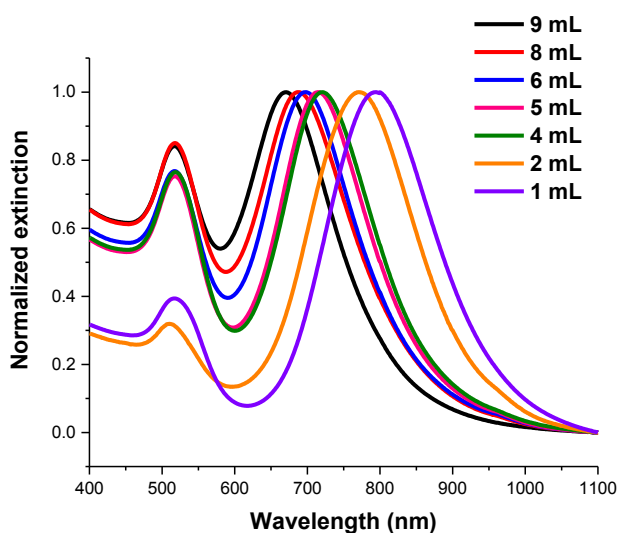

**Figure S1.** UV-Vis-NIR spectra of ascorbic acid-reduced mini AuNRs made from a seed-growth solution ratio 1:9 to 9:1 but with fixed 92 μM of AgNO<sub>3</sub>.

| Volume of a seed solution in a 10-mL growth solution | 9 mL | 8 mL | 6 mL | 5 mL | 4 mL | 2 mL | 1 mL |
|------------------------------------------------------|------|------|------|------|------|------|------|
| λ <sub>max</sub> (nm) of AuNRs                       | 671  | 688  | 698  | 715  | 721  | 771  | 793  |

**Table S2.** Plasmon maximal wavelengths of CTAB-coated, ascorbic acid-reduced mini AuNRs resulted from decreasing the volume of a seed solution in a growth solution.

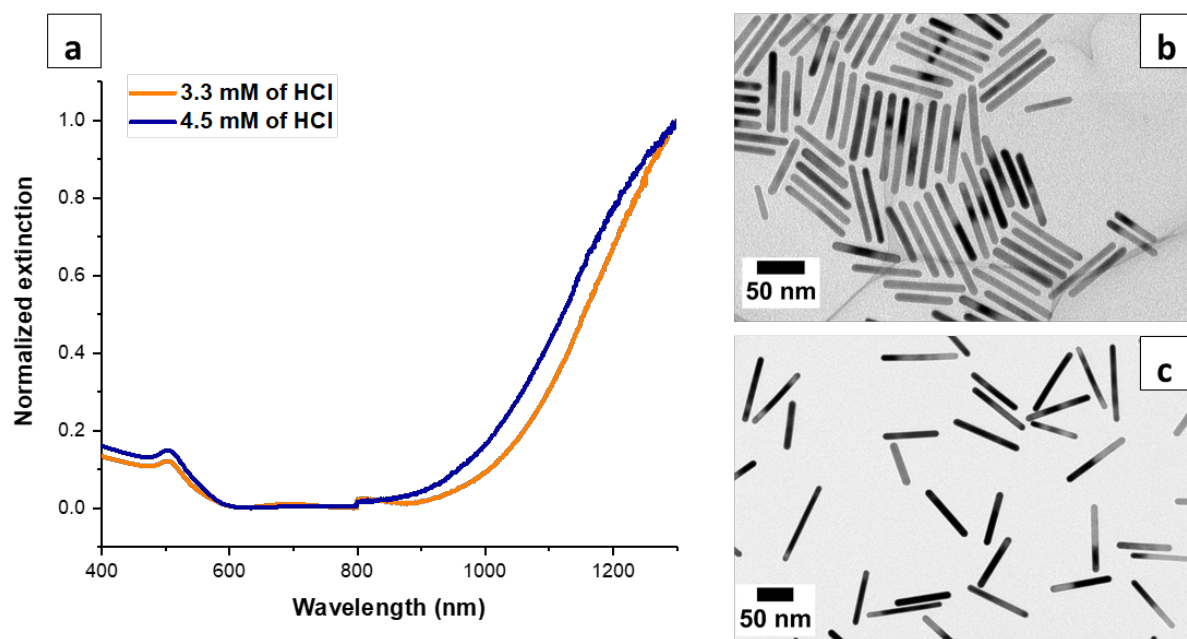

**Figure S2.** a) UV-Vis-NIR spectra of hydroquinone-reduced mini AuNRs made from 3.3 and 4.5 mM of HCl. All growth solutions contained 0.36 mM of  $\text{AgNO}_3$ . TEM image of mini AuNRs made from b) 3.3 and c) 4.5 mM of HCl.

| HCl (mM) | AR             | Longitudinal LSPR (nm) | Length (nm)     | Width (nm)    | Shape percent yield |
|----------|----------------|------------------------|-----------------|---------------|---------------------|
| 3.3      | $10.8 \pm 2.8$ | >1300                  | $93.1 \pm 18.2$ | $8.7 \pm 1.0$ | 95.9 (N = 362)      |
| 4.5      | $10.8 \pm 2.8$ | >1300                  | $92.6 \pm 18.3$ | $8.7 \pm 1.1$ | 95.9 (N = 410)      |

**Table S3.** Comparison of ARs, dimensions, and the shape percent yields of hydroquinone-reduced mini AuNRs made from 3.3 and 4.5 mM of HCl. All growth solutions contained 0.36 mM of  $\text{AgNO}_3$ .

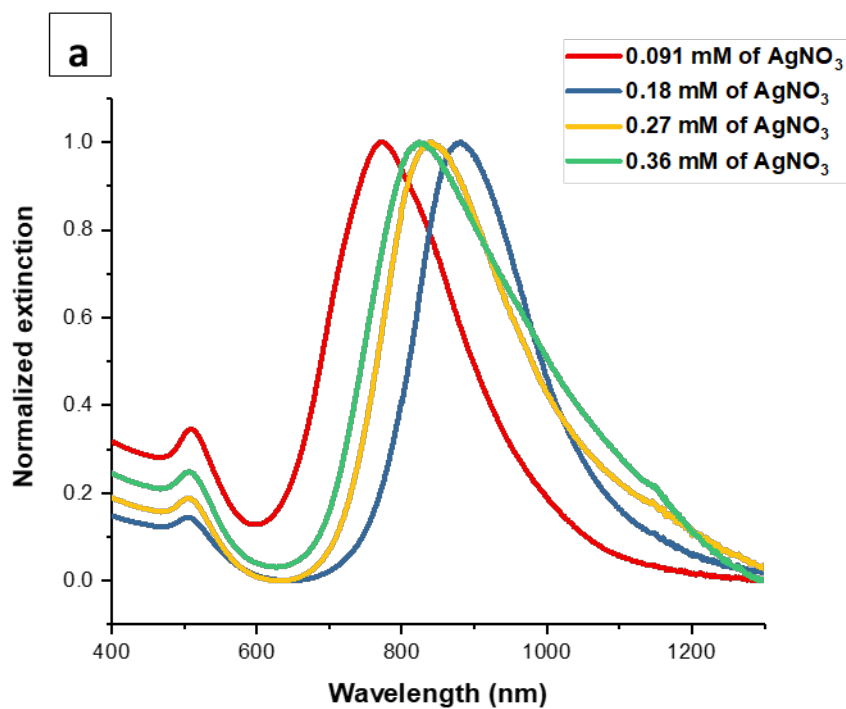

|                                         |       |      |      |      |
|-----------------------------------------|-------|------|------|------|
| Concentration of AgNO <sub>3</sub> (mM) | 0.091 | 0.18 | 0.27 | 0.36 |
| $\lambda_{\text{max}}$ (nm) of AuNRs    | 772   | 881  | 838  | 824  |

**Figure S3.** a) UV-Vis-NIR spectra of hydroquinone-reduced mini AuNRs made from various concentrations of AgNO<sub>3</sub>. All growth solutions are without HCl.

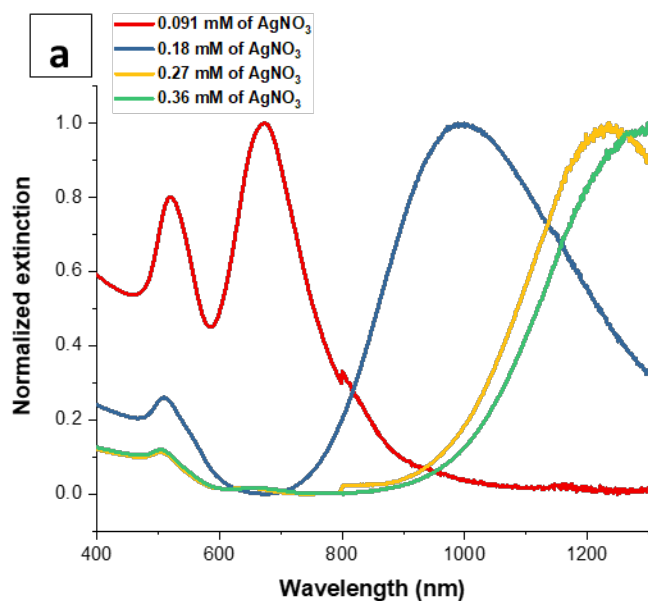

|                                         |       |      |      |       |
|-----------------------------------------|-------|------|------|-------|
| Concentration of AgNO <sub>3</sub> (mM) | 0.091 | 0.18 | 0.27 | 0.36  |
| $\lambda_{\text{max}}$ (nm) of AuNRs    | 673   | 989  | 1242 | >1300 |

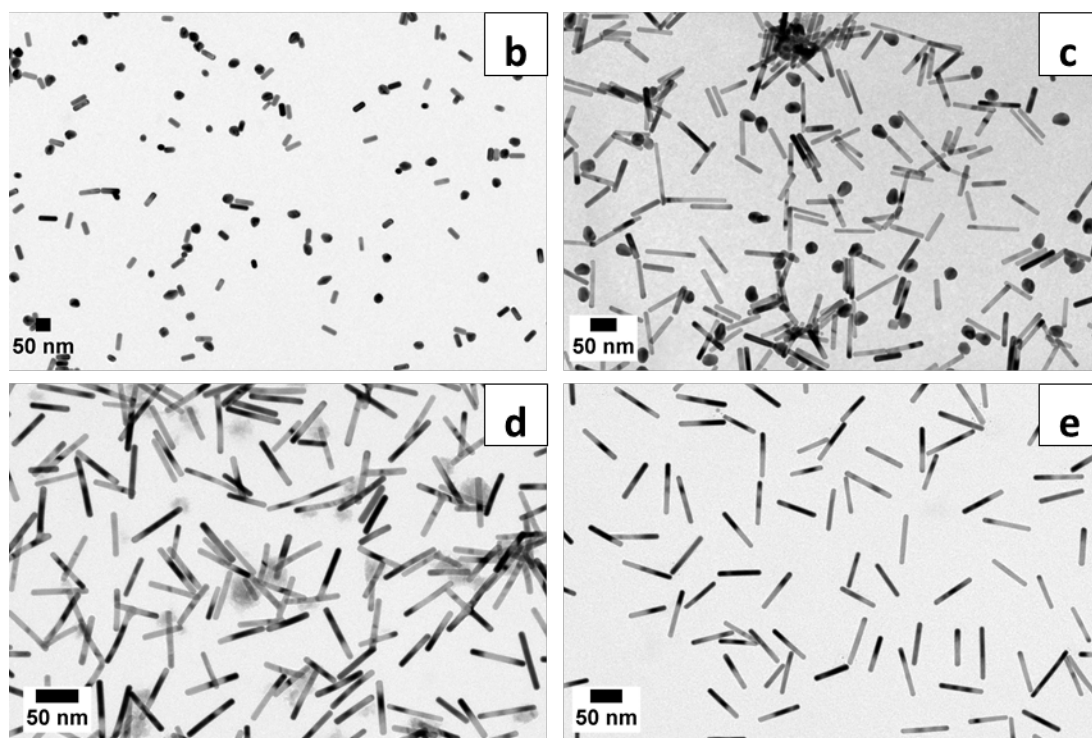

**Figure S4.** a) UV-Vis-NIR spectra of hydroquinone-reduced mini AuNRs made from various concentrations of AgNO<sub>3</sub>. All growth solutions contain 2.3 mM of HCl. TEM image of mini AuNRs made from b) 0.091, c) 0.18, d) 0.27 and d) 0.36 mM of AgNO<sub>3</sub>.

Figure S5 shows both ascorbic acid- and hydroquinone-reduced mini AuNRs are single crystals. Two planes (200) and (220) were identified in mini AuNRs of AR 3.2 with interplanar spacings  $d_{200} = 0.2042$  nm and  $d_{220} = 0.1424$  nm, which correspond to the reported values of face-centered-cubic (fcc) gold  $d_{200} = 0.2039$  nm and  $d_{220} = 0.1442$  nm, respectively (Joint Committee on Powder Diffraction Standards, No. 04-0784). In addition to (200) and (220), two planes (111) and (222) show in mini AuNRs of AR 5.6. Interplanar spacings  $d_{111} = 0.2234$  nm in Figure S5c and  $d_{222} = 0.1116$  nm in Figure S5b agree with fcc structure of metallic gold  $d_{111} = 0.2355$  nm and  $d_{222} = 0.1177$  nm. Interplanar angles are  $(200) \wedge (220) = 45.5^\circ$  in Figure S5a,  $(200) \wedge (222) = 84.1^\circ$  and  $(222) \wedge (422) = 26.1^\circ$  in Figure 5b,  $(200) \wedge (111) = 55.3^\circ$  and  $(111) \wedge (220) = 38.2^\circ$  in Figure S5c. Interplanar angles  $(200) \wedge (220) = 45.5^\circ$ ,  $(200) \wedge (111) = 55.3^\circ$  and  $(111) \wedge (220) = 38.2^\circ$  correspond well our previous results  $(200) \wedge (220) = 45^\circ$ ,  $(200) \wedge (111) = 54.7^\circ$  and  $(111) \wedge (220) = 35.3^\circ$ .<sup>1</sup>

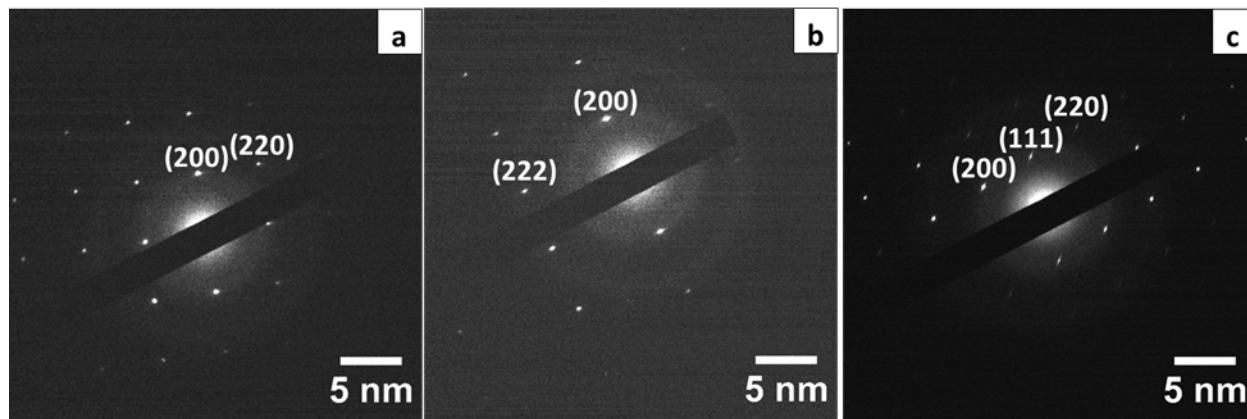

**Figure S5.** Single-crystallinity of ascorbic acid- and hydroquinone-reduced mini AuNRs. a) ascorbic acid-reduced mini AuNR AR 3.2, b) and c) hydroquinone-reduced mini AuNR AR 5.6.

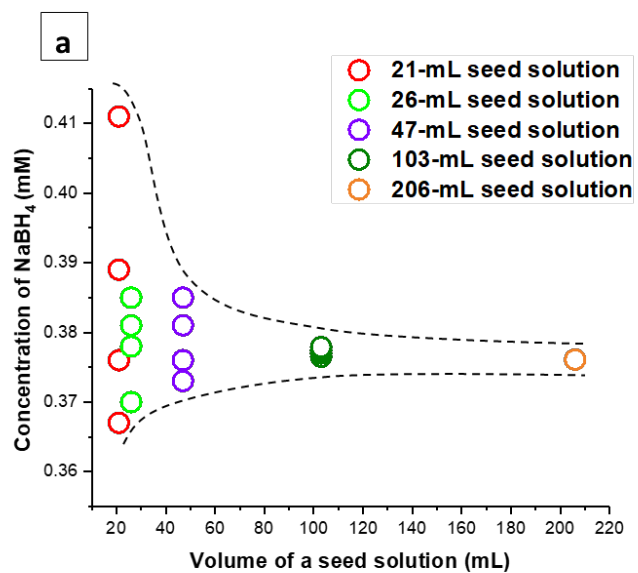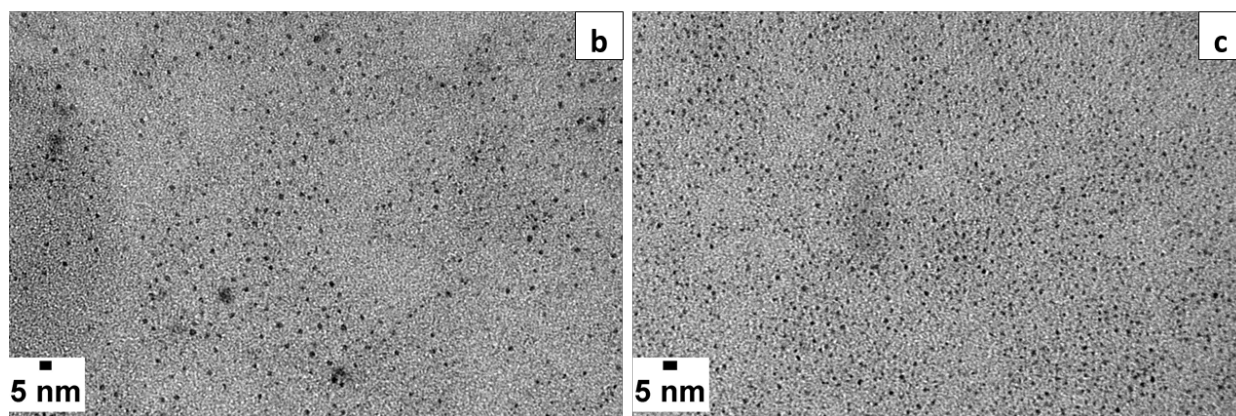

**Figure S6.** a) Ranges of  $\text{NaBH}_4$  concentrations required to produce acceptable seed solutions from 21 to 206 mL. TEM image of CTAB-capped Au seeds made from b) 10-mL and c) 206-mL seed solutions.



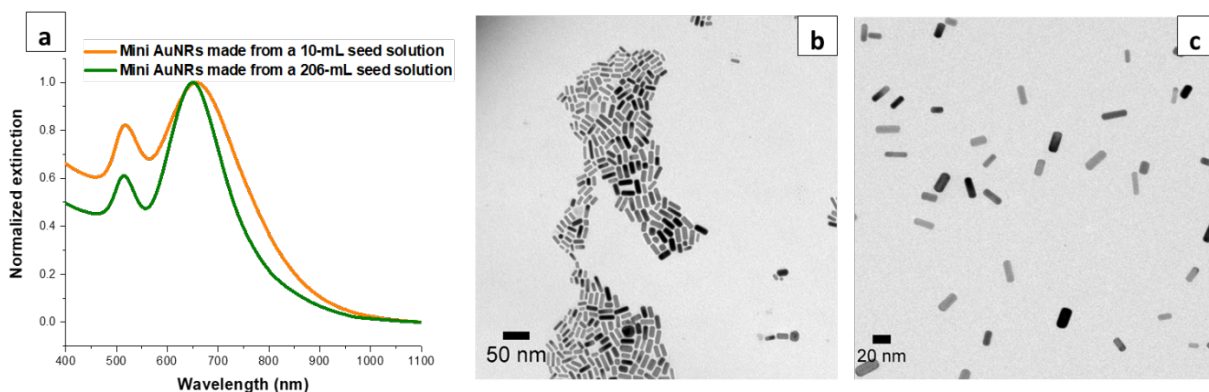

**Figure S7.** a) UV–Vis–NIR spectra of two 10-mL mini AuNRs made from 10- and 206-mL seed solutions. TEM images of mini AuNRs made from b) 10-mL and c) 206-mL seed solutions.

| Mini AuNRs made from different seed solutions | Longitudinal LSPR (nm) | Length (nm) | Width (nm) | AR        | Shape percent yield (%) |
|-----------------------------------------------|------------------------|-------------|------------|-----------|-------------------------|
| 10 mL                                         | 658                    | 19.2 ± 5.3  | 7.6 ± 1.7  | 2.6 ± 0.7 | 96.1 (N = 672)          |
| 206 mL                                        | 650                    | 19.6 ± 4.3  | 8.0 ± 1.7  | 2.5 ± 0.7 | 97.6 (N = 336)          |

**Table S4.** ARs, dimensions, and the shape percent of two 10-mL mini AuNRs made from 10- and 206-mL seed solutions. The shape percent is defined by  $\frac{\# \text{ of NRs}}{\# \text{ of all shapes}} \times 100\%$ . N refers to the number of particles been measured.

## Reference

- (1) Johnson, C. J.; Dujardin, E.; Davis, S. A.; Murphy, C. J.; Mann, S. Growth and Form of Gold Nanorods Prepared by Seed-Mediated, Surfactant-Directed Synthesis. *J. Mater. Chem.* **2002**, *12*, 1765-1770.
